# Supplementary material for: Objective quantification of the food proximity effect on grapes, chocolate and cracker consumption in a Swedish high school. A temporal analysis
Source: PLoS One. 2017 Aug 10;12(8):e0182172. doi: 10.1371/journal.pone.0182172 (PMC5552216; doi:10.1371/journal.pone.0182172)
Supplement: S1 Dataset — Data on sex, age, BMI, questionnaire answers and food item leftovers, for each participant. (XLSX) [file pone.0182172.s001.xlsx]

## Sheet: Subject measures
Subject	Condition	Sex	Age	BMI	Hunger before experiment	Fullness before experiment	Desire to eat before experiment	Hunger after experiment	Fullness after experiment	Desire to eat after experiment	Comfort during experiment	Between lunch and experiment	Grape leftovers	Chocolate leftovers	Cracker leftovers
1	Distal	F	16.3333	20.7466	49	49	75				9	Nothing	0	0	0
2	Distal	F	17.1667	20.1381	13	47	67	2	97	2	9	nothing	0	0	0
3	Distal	F	16.5	20.7422	10	43	19	8	53	11	8	Chewing gum	0	0	0
4	Distal	M	16.83	21.201	45	23	46	3	70	2	9	Chew a gum and drank water.	0	27	0
5	Distal	F	17.0833	18.7337	63	43	41				7	Water	0	0	0
6	Distal	M	15.5	22.8086	71	23	98	3	97	62	7	Nothing	0	35	0
7	Distal	F	16.9167	17.2462	55	16	45	3	74	6	9	Nothing	0	0	0
8	Distal	F	16.4167	22.5618	58	31	41	9	51	70	9	Nothing	0	0	0
9	Distal	M	16.6667	28.6547	23	72	22	3	71	22	9	Nothing	0	0	0
10	Distal	F	16.5833	22.4766	47	34	51	51	30	61	9	Nothing	0	0	0
12	Distal	F	16.6667	19.47	27	50	49				9	Gum	0	0	0
13	Distal	M	16	21.6557	22	23	23	22	48	24	8	Nothing	0	15	0
14	Distal	F	16.75	20.1025	47	47	47	22	70	21	8	Nothing	30	30	0
15	Distal	M	16.5833	18.8963	48	24	47	21	71	23	8	Water	0	0	0
16	Distal	M		22.567	72	24	72	1	100	0	9	Nothing	0	0	0
17	Distal	M	16.4167	20.4853	72	11	85	11	90	2	8	Nothing	0	2	0
18	Distal	F	17.0833	17.5749	72	46	69	37	58	38	8	Nothing	0	0	0
20	Distal	M	16.5833	20.9074	47	48	57	16	65	11	9	Nothing	0	37	0
21	Distal	M	16.5	21.0116	36	48	59	17	65	3	8	Nothing	50	0	0
22	Distal	M	15.75	19.9837	40	26	35	2	83	18	9	Nothing	0	0	0
23	Distal	F	16.5833	24.6247	22	22	46	0	22	46	6	A mandarine	0	0	0
24	Distal	M	17.25	19.8176	58	19	57	1	98	1	7	Vicks mint	0	22	0
25	Distal	F	16.75	19.4588	2	47	23	3	47	3	7	Nothing	0	0	0
26	Distal	F	17	19.3424	62	57	49	12	64	15	8	Nothing	0	0	0
1	Proximal	M	16	22.1345	33	60	48	2	98	2	9	nothing	0	0	0
2	Proximal	M	17	20.1732	53	28	62	30	28	34	8	Chewing gum	0	13	10
3	Proximal	F	16.3333	22.0107	72	5	91	9	85	1	9	Nothing	25	0	0
4	Proximal	M	16.6667	19.9295	18	51	83	48	49	27	9	Chewing gum	0	0	0
5	Proximal	F	17.0833	19.7704	0	46	0	0	71	0	9	Nothing	0	0	0
6	Proximal	M	16.75	19.8573	22	48	71	9	83	1	7	Nothing	0	0	0
7	Proximal	M	16.8333	19.1764	25	87	25	2	87	50	9	A half chocolate bar	0	0	0
8	Proximal	F		23.4668	15	75	25	3	97	11	5	Nothing	0	0	0
9	Proximal	F	16.8333	23.6324	87	6	92	23	66	7	7	Nothing	0	0	0
10	Proximal	F	17.0833	21.203	39	52	71	2	99	1	8	Nothing	0	46	0
11	Proximal	F	17	24.0533	37	21	47	5	65	3	8	Nothing	0	0	0
12	Proximal	M	16.8333	28.9735	12	6	13	18	11	9	9	500 ml water	0	38	0
13	Proximal	M	16.75	21.8837	63	27	67	39	63	26	9	Nothing	0	0	0
14	Proximal	F	17.25	24.3786	34	62	39	14	63	11	8	Nothing	0	0	0
15	Proximal	F	16.4167	18.3287	70	2	70	21	72	46	9	Nothing	0	0	0
16	Proximal	M	17.0833	20.1143	57	35	62	3	73	50	8	Nothing	0	0	0
18	Proximal	F	16.6667	20.2868	57	32	57	29	47	33	8	Nothing	0	28	0
